# Supplementary material for: Investigating stratospheric changes between 2009 and 2018 with aircraft, AirCores, and a global model focusing on CFC-11
Source: Copernicus journal article supplement (doi:10.5194/acp-2020-62), 2020-02-14
Supplement: Supplementary file 1 [file acp-2020-62-supplement.zip]

Archive with 4 entries (4 files):
- Supplement-Laube et al-Aircore-data.csv
- Supplement-Laube et al-CARIBIC-data.csv
- Supplement-Laube et al-Geophysika-data.csv
- Supplement-Laube_et_al-2020.pdf
