# Supplementary material for: Investigating stratospheric changes between 2009 and 2018 with aircraft, AirCores, and a global model focusing on CFC-11
Source: Copernicus journal article supplement (doi:10.5194/acp-2020-62), 2020-02-14
Supplement: Supplementary file 1 [file acp-2020-62-supplement.zip › Supplement-Laube et al-Aircore-data.csv]

decimal_date	flight_name	mean_age	age_error	CFC-11	CFC-12	HCFC-22	H-1301	H-1211	SF6	CFC-11_error	CFC-12_error	HCFC-22_error	H-1301_error	H-1211_error	SF6_error
		years	years	ppt	ppt	ppt	ppt	ppt	ppt	ppt	ppt	ppt	ppt	ppt	ppt
2016.33	FMIAC3	3.63	0.22	72.08	309.43	180.40	1.33	0.63	7.50	0.94	NaN	NaN	0.04	0.01	0.08
2016.33	FMIAC3	3.63	0.22	82.41	301.92	181.97	1.41	0.83	7.50	1.07	NaN	NaN	0.05	0.01	0.08
2016.33	FMIAC3	3.87	0.22	78.80	295.60	177.77	1.35	0.88	7.42	1.02	NaN	NaN	0.04	0.01	0.08
2016.33	FMIAC3	2.20	0.22	138.88	404.67	206.52	2.23	1.89	8.01	1.80	NaN	NaN	0.07	0.02	0.09
2016.33	FMIAC3	2.21	0.22	149.13	408.69	205.87	2.27	1.97	8.01	1.94	NaN	NaN	0.07	0.02	0.09
2016.33	FMIAC3	1.05	0.22	184.39	459.57	221.53	2.66	2.72	8.44	2.40	NaN	NaN	0.09	0.03	0.09
2016.33	FMIAC3	0.93	0.22	195.79	470.07	221.82	2.75	2.86	8.49	2.54	NaN	NaN	0.09	0.03	0.09
2016.69	FMIAC4	6.25	0.16	17.78	130.36	141.22	0.18	0.18	6.73	0.25	2.31	1.28	0.00	0.00	0.04
2016.69	FMIAC4	4.56	0.16	26.22	202.96	160.81	0.60	0.12	7.29	0.37	3.59	1.46	0.00	0.00	0.04
2016.69	FMIAC4	3.47	0.16	75.96	306.78	180.84	1.38	0.62	7.67	1.08	5.43	1.64	0.01	0.01	0.05
2016.69	FMIAC4	2.50	0.16	126.79	377.97	199.68	2.11	1.45	8.01	1.80	6.69	1.81	0.01	0.01	0.05
2016.69	FMIAC4	1.10	0.16	185.99	468.65	224.93	2.77	2.50	8.54	2.64	8.30	2.04	0.01	0.02	0.05
2016.69	FMIAC4	0.73	0.16	208.76	488.57	230.94	2.88	2.92	8.69	2.97	8.65	2.10	0.01	0.03	0.05
2016.69	FMIAC4	0.53	0.16	217.75	499.49	236.65	2.95	3.18	8.77	3.09	8.85	2.15	0.01	0.03	0.05
2016.69	FMIAC4	0.53	0.16	225.07	498.92	240.26	3.03	3.29	8.77	3.20	8.84	2.18	0.01	0.03	0.05
2016.69	FMIAC4	0.28	0.16	220.43	483.12	236.19	3.07	3.24	8.86	3.13	8.56	2.15	0.01	0.03	0.05
2017.35	FMIAC5	4.11	0.24	80.54	290.98	NaN	1.33	0.72	7.64	1.52	4.76	NaN	0.16	NaN	0.09
2017.35	FMIAC5	3.71	0.24	104.64	318.71	NaN	1.56	1.10	7.79	1.97	5.21	NaN	0.19	NaN	0.09
2017.35	FMIAC5	3.59	0.24	111.12	326.02	NaN	1.59	1.23	7.83	2.09	5.33	NaN	0.20	NaN	0.09
2017.35	FMIAC5	2.17	0.24	150.74	403.54	NaN	2.32	1.95	8.35	2.84	6.59	NaN	0.28	NaN	0.10
2017.35	FMIAC5	1.65	0.24	179.68	445.51	NaN	2.55	2.39	8.55	3.39	7.28	NaN	0.31	NaN	0.10
2017.35	FMIAC5	1.14	0.24	202.53	474.43	NaN	2.79	2.84	8.75	3.82	7.75	NaN	0.34	NaN	0.10
2017.35	FMIAC5	1.06	0.19	210.08	467.51	NaN	3.06	3.00	8.78	3.49	8.90	NaN	0.19	NaN	0.08
2017.35	FMIAC5	0.99	0.19	200.24	480.08	NaN	2.86	2.81	8.81	3.33	9.14	NaN	0.18	NaN	0.08
2017.35	FMIAC5	1.29	0.19	194.22	466.07	NaN	2.95	2.77	8.69	3.23	8.88	NaN	0.19	NaN	0.08
2017.35	FMIAC5	1.62	0.19	194.80	461.50	NaN	2.77	2.75	8.56	3.24	8.79	NaN	0.18	NaN	0.07
2017.35	FMIAC5	0.85	0.13	210.15	474.78	NaN	3.36	3.08	8.86	2.27	9.38	NaN	0.37	NaN	0.03
2017.36	FMIAC6	4.39	0.13	58.37	248.28	171.03	0.64	0.57	7.55	0.63	4.90	0.96	0.07	NaN	0.02
2017.36	FMIAC6	3.16	0.13	102.31	331.51	190.59	1.22	1.17	7.99	1.10	6.55	1.07	0.13	NaN	0.03
2017.36	FMIAC6	2.25	0.13	137.05	382.46	205.19	2.04	1.68	8.32	1.48	7.55	1.15	0.22	NaN	0.03
2017.36	FMIAC6	1.72	0.35	154.58	407.53	209.22	2.37	NaN	8.53	1.51	4.03	1.72	0.06	NaN	0.16
2017.36	FMIAC6	1.58	0.13	165.02	418.64	215.71	2.27	2.20	8.58	1.78	8.27	1.21	0.25	NaN	0.03
2017.36	FMIAC6	1.14	0.35	186.73	454.34	227.24	2.61	NaN	8.75	1.83	4.50	1.87	0.06	NaN	0.16
2017.36	FMIAC6	1.14	0.35	191.86	464.35	234.03	2.67		8.75	1.88	4.60	1.93	0.06	NaN	0.16
2017.72	UEAAC1	4.36	0.18	85.14	307.75	181.56	1.09	NaN	7.67	1.33	0.78	1.54	0.04	0.01	0.06
2017.72	UEAAC1	3.89	0.18	116.39	355.21	191.84	1.72	1.30	7.84	1.82	0.90	1.63	0.06	0.01	0.06
2017.72	UEAAC1	3.05	0.18	156.13	411.89	207.65	2.18	1.96	8.14	2.44	1.05	1.77	0.07	0.02	0.06
2017.72	UEAAC1	2.35	0.18	182.13	439.54	212.82	2.58	2.43	8.40	2.85	1.12	1.81	0.09	0.02	0.07
2017.72	UEAAC1	2.21	0.18	194.63	455.06	218.16	2.74	2.67	8.46	3.05	1.16	1.85	0.09	0.03	0.07
2017.72	UEAAC1	1.81	0.18	199.15	461.28	222.41	2.75	2.83	8.61	3.12	1.17	1.89	0.09	0.03	0.07
2017.72	UEAAC1	1.67	0.18	206.09	464.14	223.83	2.91	2.85	8.67	3.23	1.18	1.90	0.10	0.03	0.07
2017.72	UEAAC1	0.91	0.18	214.49	479.56	231.89	3.01	3.15	8.96	3.36	1.22	1.97	0.10	0.03	0.07
2017.72	UEAAC1	1.47	0.18	214.44	471.78	228.71	3.10	3.11	8.74	3.36	1.20	1.94	0.11	0.03	0.07
2017.72	UEAAC1	0.67	0.14	220.08	489.03	239.74	3.23	3.21	9.06	0.76	2.73	2.37	0.13	0.02	0.04
2017.72	UEAAC1	0.37	0.14	228.96	493.92	243.52	3.17	3.34	9.18	0.79	2.75	2.41	0.13	0.02	0.04
2017.72	UEAAC1	0.02	0.14	234.97	514.68	249.18	3.19	3.39	9.32	0.81	2.87	2.46	0.13	0.02	0.04
2017.72	UEAAC2	4.32	0.14	62.26	258.57	176.40	1.00	0.36	7.69	0.22	1.44	1.74	0.04	0.00	0.03
2017.72	UEAAC2	4.28	0.14	78.50	283.03	183.20	1.27	0.58	7.70	0.27	1.58	1.81	0.05	0.00	0.03
2017.72	UEAAC2	3.22	0.14	107.41	343.44	197.69	1.74	1.08	8.08	0.37	1.92	1.95	0.07	0.01	0.04
2017.72	UEAAC2	2.40	0.14	147.35	392.47	209.41	2.14	1.70	8.39	0.51	2.19	2.07	0.09	0.01	0.04
2017.72	UEAAC2	1.54	0.12	191.74	470.25	229.56	2.81	2.60	8.72	0.83	21.26	2.97	0.19	0.01	0.02
2017.72	UEAAC2	1.16	0.12	207.49	479.83	238.68	3.11	3.03	8.87	0.90	21.70	3.09	0.21	0.01	0.02
2017.72	UEAAC2	1.27	0.12	206.25	468.80	229.78	2.96	2.96	8.82	0.90	21.20	2.97	0.20	0.01	0.02
2017.72	UEAAC2	1.74	0.12	199.71	466.64	227.84	2.89	2.91	8.64	0.87	21.10	2.95	0.20	0.01	0.02
2017.73	UEAAC3	4.02	0.15	61.33	273.78	NaN	NaN	0.50	7.79	0.90	1.30	NaN	NaN	0.02	0.04
2017.73	UEAAC3	2.72	0.15	112.73	358.24	NaN	NaN	1.21	8.27	1.66	1.70	NaN	NaN	0.06	0.05
2017.73	UEAAC3	2.07	0.15	154.16	417.30	NaN	NaN	1.89	8.51	2.27	1.98	NaN	NaN	0.09	0.05
2017.73	UEAAC3	1.35	0.15	183.15	457.55	NaN	NaN	2.49	8.79	2.70	2.17	NaN	NaN	0.12	0.05
2017.73	UEAAC3	1.26	0.15	195.59	463.29	NaN	NaN	2.67	8.83	2.88	2.20	NaN	NaN	0.13	0.05
2017.73	UEAAC3	0.69	0.23	206.86	485.49	NaN	NaN	2.94	9.05	1.01	1.67	NaN	NaN	0.10	0.10
2017.73	UEAAC3	0.53	0.23	209.80	485.87	NaN	NaN	3.11	9.12	1.02	1.68	NaN	NaN	0.11	0.10
2017.73	UEAAC3	0.97	0.23	212.93	493.74	NaN	NaN	3.03	8.94	1.04	1.70	NaN	NaN	0.11	0.10
2017.73	UEAAC3	0.60	0.23	216.92	493.79	NaN	NaN	3.11	9.09	1.06	1.70	NaN	NaN	0.11	0.10
2018.34	FMIAC7	4.54	0.18	56.57	238.08	166.63	1.06	0.44	7.79	0.68	2.53	2.04	0.02	0.01	0.06
2018.34	FMIAC7	3.75	0.18	84.22	297.15	184.59	1.47	0.81	8.08	1.01	3.15	2.26	0.03	0.02	0.06
2018.34	FMIAC7	2.92	0.18	115.95	354.15	197.41	1.85	1.30	8.39	1.39	3.76	2.42	0.04	0.04	0.07
2018.34	FMIAC7	2.07	0.18	142.59	389.23	214.08	2.24	1.80	8.72	1.71	4.13	2.62	0.04	0.05	0.07
2018.34	FMIAC7	1.85	0.18	163.22	421.94	217.66	2.44	2.11	8.80	1.96	4.48	2.66	0.05	0.06	0.07
2018.34	FMIAC7	1.59	0.18	179.82	442.34	223.79	2.64	2.36	8.90	2.16	4.69	2.74	0.05	0.07	0.07
2018.34	FMIAC7	1.66	0.18	179.33	434.42	220.80	2.54	2.42	8.88	2.16	4.61	2.70	0.05	0.07	0.07
2018.34	FMIAC7	1.64	0.22	184.82	427.14	219.49	NaN	2.37	8.89	1.27	6.01	1.52	NaN	0.03	0.09
2018.34	FMIAC7	0.95	0.22	208.02	476.22	233.30	NaN	2.96	9.16	1.43	6.71	1.62	NaN	0.04	0.10
2018.34	FMIAC7	0.47	0.22	216.07	488.46	240.26	NaN	3.18	9.35	1.49	6.88	1.67	NaN	0.05	0.10
2018.34	FMIAC7	0.03	0.22	226.36	504.39	246.79	NaN	3.31	9.53	1.56	7.10	1.71	NaN	0.05	0.10
2018.34	FMIAC7	NaN	NaN	229.40	509.38	250.93	NaN	3.44	NaN	1.58	7.17	1.74	NaN	0.05	NaN
2018.38	UEAAC7	4.21	0.17	50.21	259.14	173.71	1.07	0.29	7.93	0.12	1.91	0.96	0.03	0.00	0.06
2018.38	UEAAC7	3.16	0.17	97.64	339.51	192.09	1.69	0.85	8.31	0.24	2.51	1.06	0.04	0.01	0.06
2018.38	UEAAC7	2.62	0.27	126.41	366.76	196.09	2.04	1.37	8.51	0.36	6.14	4.57	0.02	0.03	0.12
2018.38	UEAAC7	2.77	0.27	137.73	381.35	198.11	2.14	1.60	8.46	0.39	6.39	4.61	0.02	0.03	0.12
2018.38	UEAAC7	1.68	0.27	167.18	418.56	218.17	2.52	2.11	8.88	0.47	7.01	5.08	0.02	0.04	0.12
2018.38	UEAAC7	1.87	0.27	173.38	430.28	218.37	2.64	2.20	8.81	0.49	7.20	5.08	0.03	0.04	0.12
2018.38	UEAAC7	1.57	0.27	181.61	431.09	221.37	2.66	2.40	8.92	0.51	7.22	5.15	0.03	0.04	0.12
2018.38	UEAAC7	1.74	0.27	179.38	423.81	222.42	2.57	2.36	8.86	0.51	7.10	5.18	0.02	0.04	0.12
2018.38	UEAAC7	1.37	0.27	181.94	427.11	220.59	2.63	2.27	9.01	0.51	7.15	5.14	0.03	0.04	0.12
2018.38	UEAAC7	1.12	0.17	192.36	447.41	224.63	2.89	2.62	9.10	0.46	3.30	1.24	0.07	0.02	0.06
2018.38	UEAAC7	1.15	0.17	187.92	444.96	222.68	2.77	2.55	9.09	0.45	3.28	1.23	0.07	0.02	0.06
2018.38	UEAAC7	1.18	0.17	189.67	443.60	227.28	2.84	2.61	9.08	0.46	3.27	1.25	0.07	0.02	0.06
2018.38	UEAAC7	1.12	0.17	196.70	452.88	228.07	3.07	2.69	9.11	0.47	3.34	1.26	0.08	0.02	0.06
2018.41	UEAAC8	4.16	0.31	46.67	264.47	175.11	1.02	0.25	7.96	0.22	4.54	1.00	0.02	0.00	0.13
2018.41	UEAAC8	3.70	0.31	94.21	325.56	191.53	1.58	0.79	8.12	0.45	5.59	1.09	0.03	0.02	0.13
2018.41	UEAAC8	2.91	0.31	109.92	345.24	194.69	1.84	1.13	8.42	0.52	5.92	1.11	0.03	0.02	0.14
2018.41	UEAAC8	2.17	0.31	161.84	411.72	214.61	2.41	2.06	8.70	0.76	7.06	1.22	0.04	0.04	0.14
2018.41	UEAAC8	1.56	0.30	165.98	419.32	215.09	2.39	1.99	8.94	1.27	7.52	2.63	0.05	0.04	0.14
2018.41	UEAAC8	1.41	0.30	177.35	444.35	225.67	2.57	2.33	9.00	1.36	7.97	2.76	0.06	0.05	0.14
2018.41	UEAAC8	0.85	0.30	199.01	471.52	229.67	2.80	2.85	9.22	1.53	8.46	2.81	0.06	0.06	0.14
2018.41	UEAAC8	0.42	0.30	217.88	487.10	238.46	3.05	3.12	9.39	1.67	8.74	2.92	0.07	0.07	0.14
2018.41	UEAAC8	1.02	0.30	211.29	480.20	234.44	3.03	2.91	9.16	1.62	8.61	2.87	0.07	0.06	0.14
2018.41	UEAAC8	0.70	0.30	215.03	489.34	237.88	3.10	2.98	9.28	1.65	8.78	2.91	0.07	0.06	0.14
2018.41	UEAAC8	0.40	0.30	219.68	484.83	238.89	3.15	3.13	9.41	1.69	8.70	2.92	0.07	0.07	0.14
2018.41	UEAAC8	-0.25	0.30	225.25	505.49	245.82	3.22	3.26	9.67	1.73	9.07	3.01	0.07	0.07	0.15
2018.41	UEAAC8	-0.22	0.30	229.86	500.51	244.84	3.22	3.30	9.65	1.76	8.98	3.00	0.07	0.07	0.15
2018.51	RINGO1	4.47	0.16	56.39	254.45	175.03	1.05	0.41	7.87	0.52	1.78	0.75	0.02	0.00	0.05
2018.51	RINGO1	3.57	0.16	90.21	303.09	190.48	1.53	0.87	8.20	0.83	2.12	0.82	0.04	0.01	0.05
2018.51	RINGO1	2.71	0.16	125.07	364.21	203.69	2.05	1.53	8.53	1.15	2.55	0.88	0.05	0.01	0.06
2018.51	RINGO1	2.01	0.16	158.94	418.21	215.90	2.41	2.08	8.80	1.46	2.92	0.93	0.06	0.02	0.06
2018.51	RINGO1	1.45	0.16	176.48	438.39	224.90	2.71	2.43	9.02	1.62	3.07	0.97	0.06	0.02	0.06
2018.51	RINGO1	1.07	0.16	201.24	471.70	238.29	3.11	2.80	9.17	1.85	3.30	1.03	0.07	0.03	0.06
2018.51	RINGO1	1.01	0.16	195.70	459.98	233.76	2.85	2.73	9.19	1.80	3.22	1.01	0.07	0.03	0.06
2018.51	RINGO1	1.48	0.16	190.12	453.91	228.99	2.84	2.51	9.01	1.75	3.17	0.99	0.06	0.02	0.06
2018.51	RINGO1	1.48	0.17	193.55	460.67	231.74	2.80	2.71	9.00	0.45	1.84	0.89	0.04	0.05	0.06
2018.51	RINGO1	1.16	0.17	194.09	458.11	228.82	2.83	2.76	9.13	0.46	1.83	0.87	0.04	0.05	0.06
2018.51	RINGO1	0.63	0.17	205.93	473.99	240.54	3.00	2.97	9.35	0.48	1.90	0.92	0.05	0.05	0.06
2018.51	RINGO1	-0.53	0.17	226.27	499.35	256.27	3.21	3.30	9.82	0.53	2.00	0.98	0.05	0.06	0.07
2018.51	RINGO1	-0.81	0.17	231.59	500.01	259.48	3.35	3.37	9.93	0.54	2.00	0.99	0.05	0.06	0.07
2018.51	RINGO1	-0.71	0.16	232.12	500.17	259.83	3.13	3.39	9.89	2.13	3.50	1.12	0.07	0.03	0.06
2018.51	RINGO2	4.62	0.19	51.94	251.19	169.68	1.03	0.35	7.82	0.58	1.59	0.93	0.04	0.01	0.07
2018.51	RINGO3	4.63	0.17	52.58	245.77	169.83	0.88	0.33	7.82	0.26	1.98	1.31	0.01	0.01	0.06
2018.51	RINGO2	3.55	0.19	93.43	315.36	185.87	1.59	0.95	8.21	1.05	2.00	1.01	0.06	0.03	0.07
2018.51	RINGO3	3.54	0.17	106.12	325.94	191.47	1.62	1.07	8.22	0.53	2.63	1.47	0.01	0.02	0.06
2018.51	RINGO2	2.76	0.19	136.33	373.19	205.60	2.13	1.53	8.51	1.53	2.37	1.12	0.08	0.05	0.07
2018.51	RINGO3	3.22	0.17	131.53	363.29	202.24	2.01	1.53	8.33	0.66	2.93	1.55	0.02	0.03	0.06
2018.51	RINGO2	1.37	0.19	172.18	434.43	224.23	2.57	2.26	9.05	1.93	2.76	1.22	0.10	0.08	0.08
2018.51	RINGO3	2.55	0.17	153.54	390.31	210.46	2.25	1.90	8.59	0.77	3.14	1.62	0.02	0.04	0.06
2018.51	RINGO2	0.86	0.19	190.01	457.31	229.14	2.73	2.58	9.26	2.13	2.90	1.25	0.10	0.09	0.08
2018.51	RINGO3	2.07	0.17	176.72	433.18	216.97	2.58	2.33	8.77	0.89	3.49	1.67	0.02	0.05	0.06
2018.51	RINGO2	1.24	0.19	193.45	453.64	227.63	2.82	2.62	9.10	2.17	2.88	1.24	0.11	0.09	0.08
2018.51	RINGO3	1.60	0.17	193.51	457.10	222.65	2.83	2.71	8.96	0.97	3.68	1.71	0.02	0.06	0.06
2018.51	RINGO2	1.33	0.31	198.14	460.00	229.87	2.74	2.60	9.07	1.38	4.40	1.81	0.05	0.05	0.14
2018.51	RINGO3	1.36	0.17	196.44	464.31	224.63	2.91	2.67	9.06	0.99	3.74	1.73	0.02	0.06	0.07
2018.51	RINGO2	1.39	0.31	196.20	461.00	229.05	2.81	2.72	9.04	1.37	4.41	1.81	0.06	0.05	0.14
2018.51	RINGO3	2.01	0.17	192.14	454.30	222.47	2.84	2.56	8.80	0.97	3.66	1.71	0.02	0.05	0.06
2018.51	RINGO2	1.52	0.31	204.02	472.23	231.60	2.82	2.84	8.99	1.42	4.51	1.83	0.06	0.05	0.14
2018.51	RINGO3	1.50	0.17	201.58	462.21	228.80	2.96	2.72	9.00	1.02	3.72	1.76	0.02	0.06	0.07
2018.51	RINGO2	1.23	0.31	205.91	469.13	232.61	2.84	2.83	9.11	1.44	4.48	1.83	0.06	0.05	0.14
2018.51	RINGO2	1.19	0.31	215.39	470.76	240.38	2.94	2.87	9.12	1.50	4.50	1.89	0.06	0.05	0.14
2018.51	RINGO3	1.31	0.17	194.34	456.33	229.30	2.82	2.63	9.08	0.98	3.68	1.76	0.02	0.06	0.07
2018.51	RINGO3	2.04	0.17	188.29	446.03	222.87	2.73	2.45	8.79	0.95	3.59	1.71	0.02	0.05	0.06
2018.51	RINGO3	1.72	0.17	188.96	450.17	222.97	2.76	2.52	8.91	0.95	3.63	1.71	0.02	0.05	0.06
2018.78	UEAAC9	3.72	0.18	73.11	342.68	189.73	1.72	0.93	8.23	0.67	2.09	1.12	0.02	0.02	0.06
2018.78	UEAAC9	2.61	0.18	143.51	417.14	209.83	2.32	1.74	8.65	1.31	2.54	1.23	0.02	0.04	0.07
2018.78	UEAAC9	1.65	0.18	186.81	458.11	225.56	2.82	2.45	9.03	1.70	2.79	1.33	0.03	0.06	0.07
2018.78	UEAAC9	1.03	0.18	212.72	481.68	234.80	2.94	2.87	9.28	1.94	2.94	1.38	0.03	0.07	0.07
2018.78	UEAAC9	0.67	0.18	226.16	489.58	241.21	3.05	3.03	9.43	2.06	2.99	1.42	0.03	0.08	0.07
2018.78	UEAAC9	0.48	0.18	232.08	501.63	249.27	3.11	3.24	9.50	2.11	3.06	1.47	0.03	0.08	0.08
2018.78	UEAAC9	-0.54	0.17	239.99	511.73	254.71	3.31	3.33	9.92	0.40	3.38	2.90	0.05	0.07	0.07
2018.78	UEAAC9	-0.05	0.17	235.43	508.17	250.14	3.29	3.31	9.72	0.40	3.36	2.85	0.05	0.07	0.07
2018.78	UEAAC9	0.11	0.17	234.71	505.75	251.41	3.29	3.32	9.65	0.39	3.34	2.87	0.05	0.07	0.07
2018.78	UEAAC9	-0.05	0.17	239.32	507.93	256.05	3.38	3.41	9.72	0.40	3.36	2.92	0.05	0.07	0.07
2018.78	UEAAC9	-0.13	0.17	239.44	510.91	256.35	3.36	3.50	9.75	0.40	3.38	2.92	0.05	0.07	0.07
2018.78	UEAAC9	0.16	0.17	232.84	495.34	250.19	3.37	3.30	9.63	0.39	3.27	2.85	0.05	0.07	0.07
2018.82	UEAAC10	4.13	0.14	67.31	291.24	180.20	1.38	0.59	8.10	0.84	4.25	1.40	0.01	0.01	0.04
2018.82	UEAAC10	3.41	0.14	100.05	338.72	194.97	1.81	1.13	8.36	1.25	4.94	1.52	0.01	0.01	0.04
2018.82	UEAAC10	2.37	0.14	149.32	418.09	217.23	2.47	2.01	8.76	1.87	6.10	1.69	0.02	0.02	0.04
2018.82	UEAAC10	1.55	0.14	175.51	456.69	230.74	2.72	2.57	9.08	2.20	6.66	1.79	0.02	0.02	0.04
2018.82	UEAAC10	1.46	0.14	189.68	471.39	235.64	2.92	2.75	9.12	2.38	6.88	1.83	0.02	0.03	0.04
2018.82	UEAAC10	0.50	0.18	203.53	483.66	241.42	3.30	2.92	9.51	1.85	2.95	1.42	0.03	0.07	0.08
2018.82	UEAAC10	-0.05	0.18	211.31	495.99	249.63	3.32	3.03	9.73	1.92	3.03	1.47	0.03	0.08	0.08
2018.82	UEAAC10	-0.06	0.18	214.96	500.29	251.29	3.30	3.13	9.73	1.96	3.05	1.48	0.03	0.08	0.08
2018.82	UEAAC10	0.15	0.18	214.00	496.57	248.96	3.33	3.06	9.65	1.95	3.03	1.46	0.03	0.08	0.08
2018.82	UEAAC10	0.03	0.18	214.03	496.77	246.56	3.24	3.14	9.70	1.95	3.03	1.45	0.03	0.08	0.08
2018.82	UEAAC10	0.71	0.18	211.71	477.82	241.60	3.01	3.11	9.42	1.93	2.92	1.42	0.03	0.08	0.07
