# Supplementary material for: Investigating stratospheric changes between 2009 and 2018 with aircraft, AirCores, and a global model focusing on CFC-11
Source: Copernicus journal article supplement (doi:10.5194/acp-2020-62), 2020-02-14
Supplement: Supplementary file 1 [file acp-2020-62-supplement.zip › Supplement-Laube et al-CARIBIC-data.csv]

decimal_date	sample-id	CFC-11	CFC-12	HCFC-22	H-1301	H-1211	SF6	CFC-11_error	CFC-12_error	HCFC-22_error	H-1301_error	H-1211_error	SF6_error
		ppt	ppt	ppt	ppt	ppt	ppt	ppt	ppt	ppt	ppt	ppt	ppt
2009.825342	CARIBIC_SA_R2C3_01	240.92	531.09	NaN	3.14	NaN	7.00	1.54	8.75	NaN	0.04	NaN	0.01
2009.825342	CARIBIC_SA_R2C3_02	240.92	523.45	NaN	3.18	NaN	6.97	1.54	8.63	NaN	0.04	NaN	0.01
2009.825342	CARIBIC_SA_R2C3_03	238.42	532.14	NaN	3.14	NaN	6.90	1.52	8.77	NaN	0.04	NaN	0.01
2009.825342	CARIBIC_SA_R2C3_04	239.50	531.06	NaN	3.16	NaN	6.99	1.53	8.75	NaN	0.04	NaN	0.01
2009.825342	CARIBIC_SA_R2C3_05	240.29	533.54	NaN	3.16	NaN	6.89	1.54	8.79	NaN	0.04	NaN	0.01
2009.825342	CARIBIC_SA_R2C3_06	241.93	529.89	NaN	3.18	NaN	6.81	1.55	8.73	NaN	0.04	NaN	0.01
2009.825342	CARIBIC_SA_R2C3_07	241.79	530.04	NaN	3.15	NaN	6.81	1.55	8.73	NaN	0.04	NaN	0.01
2009.825342	CARIBIC_SA_R2C3_08	242.02	529.63	NaN	3.13	NaN	6.81	1.55	8.73	NaN	0.04	NaN	0.01
2009.825342	CARIBIC_SA_R2C3_09	241.13	530.58	NaN	3.13	NaN	6.76	1.54	8.74	NaN	0.04	NaN	0.01
2009.825342	CARIBIC_SA_R2C3_10	238.68	529.84	NaN	3.14	NaN	6.80	1.90	3.46	NaN	0.01	NaN	0.04
2009.825342	CARIBIC_SA_R2C3_11	238.77	531.69	NaN	3.17	NaN	6.89	1.90	3.47	NaN	0.01	NaN	0.04
2009.825342	CARIBIC_SA_R2C3_12	239.90	530.18	NaN	3.15	NaN	6.78	1.91	3.46	NaN	0.01	NaN	0.04
2009.825342	CARIBIC_SA_R2C3_13	239.67	531.65	NaN	3.13	NaN	6.92	1.91	3.47	NaN	0.01	NaN	0.04
2009.825342	CARIBIC_SA_R2C3_14	239.21	532.99	NaN	3.18	NaN	6.80	1.91	3.48	NaN	0.01	NaN	0.04
2009.825342	CARIBIC_SA_R2C4_02	236.78	530.68	NaN	3.12	NaN	6.86	1.89	3.46	NaN	0.01	NaN	0.04
2009.825342	CARIBIC_SA_R2C4_04	238.50	536.52	NaN	3.16	NaN	6.86	1.90	3.50	NaN	0.01	NaN	0.04
2009.825342	CARIBIC_SA_R2C4_06	239.85	521.63	NaN	3.13	NaN	6.87	1.91	3.40	NaN	0.01	NaN	0.04
2009.825342	CARIBIC_SA_R2C4_08	240.76	517.58	NaN	3.16	NaN	6.92	1.92	3.38	NaN	0.01	NaN	0.04
2009.825342	CARIBIC_SA_R2C4_10	239.23	523.96	NaN	3.13	NaN	6.98	1.91	3.42	NaN	0.01	NaN	0.05
2009.825342	CARIBIC_SA_R2C4_12	240.65	526.94	NaN	3.18	NaN	6.93	1.92	3.44	NaN	0.01	NaN	0.04
2009.825342	CARIBIC_SA_R2C4_14	238.48	524.03	NaN	3.16	NaN	6.83	1.90	3.42	NaN	0.01	NaN	0.04
2010.871689	CARIBIC_SA_R2C3_14	238.36	536.03	NaN	3.14	4.12	7.10	0.97	7.89	NaN	0.02	0.02	0.06
2010.871689	CARIBIC_SA_R2C3_13	239.12	537.18	NaN	3.16	4.08	7.09	0.97	7.91	NaN	0.02	0.02	0.06
2010.871689	CARIBIC_SA_R2C3_12	239.64	530.53	NaN	3.14	4.07	7.05	0.97	7.81	NaN	0.02	0.02	0.06
2010.871689	CARIBIC_SA_R2C3_11	237.03	523.87	NaN	3.15	4.05	7.02	0.96	7.72	NaN	0.02	0.02	0.06
2010.871689	CARIBIC_SA_R2C3_10	238.11	528.65	NaN	3.14	4.06	7.03	0.97	7.79	NaN	0.02	0.02	0.06
2010.871689	CARIBIC_SA_R2C3_09	237.01	520.11	NaN	3.12	3.98	6.99	0.96	7.66	NaN	0.02	0.02	0.06
2010.871689	CARIBIC_SA_R2C3_08	242.19	528.22	NaN	3.19	4.12	7.16	0.98	7.78	NaN	0.02	0.02	0.06
2010.871689	CARIBIC_SA_R2C3_07	239.46	530.45	NaN	3.19	4.11	7.19	0.78	5.91	NaN	0.01	0.01	0.04
2010.871689	CARIBIC_SA_R2C3_06	240.47	529.99	NaN	3.20	4.15	7.27	0.79	5.90	NaN	0.01	0.01	0.04
2010.871689	CARIBIC_SA_R2C3_05	238.72	538.62	NaN	3.21	4.15	7.33	0.78	6.00	NaN	0.01	0.01	0.04
2010.871689	CARIBIC_SA_R2C3_04	239.27	534.35	NaN	3.22	4.13	7.30	0.78	5.95	NaN	0.01	0.01	0.04
2010.871689	CARIBIC_SA_R2C3_03	237.68	527.30	NaN	3.19	4.10	7.21	0.78	5.87	NaN	0.01	0.01	0.04
2010.871689	CARIBIC_SA_R2C3_02	238.04	525.82	NaN	3.19	4.10	7.16	0.78	5.86	NaN	0.01	0.01	0.04
2011.221461	CARIBIC_SA_R2C5_01	NaN	527.24	NaN	3.20	4.14	7.38	NaN	0.97	NaN	0.01	0.00	0.01
2011.221461	CARIBIC_SA_R2C5_02	NaN	525.57	NaN	3.22	4.16	7.38	NaN	0.97	NaN	0.01	0.00	0.01
2011.221461	CARIBIC_SA_R2C5_03	NaN	523.86	NaN	3.19	4.10	7.36	NaN	0.97	NaN	0.01	0.00	0.01
2011.221461	CARIBIC_SA_R2C5_04	NaN	516.09	NaN	3.06	3.91	7.27	NaN	0.95	NaN	0.01	0.00	0.01
2011.221461	CARIBIC_SA_R2C5_05	NaN	527.51	NaN	3.17	4.06	7.25	NaN	0.97	NaN	0.01	0.00	0.01
2011.221461	CARIBIC_SA_R2C5_06	NaN	528.79	NaN	3.17	4.09	7.30	NaN	0.98	NaN	0.01	0.00	0.01
2011.221461	CARIBIC_SA_R2C5_07	NaN	528.52	NaN	3.19	4.07	7.29	NaN	0.97	NaN	0.01	0.00	0.01
2011.221461	CARIBIC_SA_R2C5_08	NaN	525.69	NaN	3.16	4.07	7.23	NaN	0.79	NaN	0.01	0.02	0.01
2011.221461	CARIBIC_SA_R2C5_09	NaN	525.79	NaN	3.18	4.06	7.21	NaN	0.79	NaN	0.01	0.02	0.01
2011.221461	CARIBIC_SA_R2C5_10	NaN	528.91	NaN	3.20	4.08	7.28	NaN	0.80	NaN	0.01	0.03	0.01
2011.221461	CARIBIC_SA_R2C5_11	NaN	528.75	NaN	3.15	4.04	7.33	NaN	0.80	NaN	0.01	0.02	0.01
2011.221461	CARIBIC_SA_R2C5_12	NaN	526.23	NaN	3.17	4.05	7.15	NaN	0.79	NaN	0.01	0.02	0.01
2011.221461	CARIBIC_SA_R2C5_13	NaN	524.48	NaN	3.19	4.05	7.23	NaN	0.79	NaN	0.01	0.02	0.01
2011.221461	CARIBIC_SA_R2C5_14	NaN	527.18	NaN	3.17	4.07	7.24	NaN	0.80	NaN	0.01	0.02	0.01
2011.221461	CARIBIC_SA_R2C5_01	238.64	NaN	221.02	NaN	NaN	7.50	0.41	NaN	0.80	NaN	NaN	0.03
2011.221461	CARIBIC_SA_R2C5_02	239.10	NaN	221.21	NaN	NaN	7.38	0.41	NaN	0.81	NaN	NaN	0.03
2011.221461	CARIBIC_SA_R2C5_03	242.61	NaN	217.01	NaN	NaN	7.32	0.42	NaN	0.79	NaN	NaN	0.03
2011.221461	CARIBIC_SA_R2C5_04	229.06	NaN	208.00	NaN	NaN	7.20	0.39	NaN	0.76	NaN	NaN	0.03
2011.221461	CARIBIC_SA_R2C5_05	238.74	NaN	211.84	NaN	NaN	7.35	0.41	NaN	0.77	NaN	NaN	0.03
2011.221461	CARIBIC_SA_R2C5_06	238.07	NaN	211.22	NaN	NaN	7.29	0.41	NaN	0.77	NaN	NaN	0.03
2011.221461	CARIBIC_SA_R2C5_07	237.68	NaN	209.34	NaN	NaN	7.22	0.41	NaN	0.76	NaN	NaN	0.03
2011.221461	CARIBIC_SA_R2C5_08	237.00	NaN	207.92	NaN	NaN	7.27	0.41	NaN	0.76	NaN	NaN	0.03
2011.221461	CARIBIC_SA_R2C5_09	237.55	NaN	209.70	NaN	NaN	7.29	0.41	NaN	0.76	NaN	NaN	0.03
2011.221461	CARIBIC_SA_R2C5_10	238.21	NaN	209.93	NaN	NaN	7.32	0.41	NaN	0.76	NaN	NaN	0.03
2011.221461	CARIBIC_SA_R2C5_11	234.68	NaN	205.32	NaN	NaN	7.34	0.40	NaN	0.75	NaN	NaN	0.03
2011.221461	CARIBIC_SA_R2C5_12	236.47	NaN	204.47	NaN	NaN	7.18	0.41	NaN	0.74	NaN	NaN	0.03
2011.221461	CARIBIC_SA_R2C5_13	235.86	NaN	204.83	NaN	NaN	7.18	0.41	NaN	0.75	NaN	NaN	0.03
2011.221461	CARIBIC_SA_R2C5_14	237.29	NaN	206.67	NaN	NaN	7.18	0.41	NaN	0.75	NaN	NaN	0.03
2013.140868	CARIBIC-FFM-BAN-20130221-01	230.21	519.48	218.49	3.20	NaN	7.72	0.96	2.66	1.04	0.02	NaN	0.01
2013.140868	CARIBIC-FFM-BAN-20130221-2	230.05	519.33	218.51	3.21	NaN	7.80	0.96	2.66	1.04	0.02	NaN	0.01
2013.140868	CARIBIC-FFM-BAN-20130221-3	233.43	522.00	219.97	3.21	NaN	7.75	0.97	2.67	1.05	0.02	NaN	0.01
2013.140868	CARIBIC-FFM-BAN-20130221-4	233.61	519.25	218.24	3.22	NaN	7.80	0.97	2.66	1.04	0.02	NaN	0.01
2013.140868	CARIBIC-FFM-BAN-20130221-5	233.82	522.49	219.38	3.24	NaN	7.82	0.97	2.67	1.05	0.02	NaN	0.01
2013.140868	CARIBIC-FFM-BAN-20130221-6	232.42	520.44	218.27	3.25	NaN	7.80	0.97	2.66	1.04	0.02	NaN	0.01
2013.140868	CARIBIC-FFM-BAN-20130221-7	234.25	525.87	220.57	3.25	NaN	7.85	0.64	1.62	0.64	0.02	NaN	0.05
2013.140868	CARIBIC-FFM-BAN-20130221-8	234.63	526.19	221.70	3.28	NaN	7.84	0.64	1.62	0.64	0.02	NaN	0.05
2013.140868	CARIBIC-FFM-BAN-20130221-9	234.73	527.47	221.99	3.26	NaN	7.87	0.64	1.62	0.65	0.02	NaN	0.05
2013.140868	CARIBIC-FFM-BAN-20130221-10	234.73	527.15	223.09	3.29	NaN	7.90	0.64	1.62	0.65	0.02	NaN	0.05
2013.140868	CARIBIC-FFM-BAN-20130221-11	234.47	524.12	222.21	3.24	NaN	7.87	0.64	1.61	0.65	0.02	NaN	0.05
2013.140868	CARIBIC-FFM-BAN-20130221-12	234.17	520.45	223.30	3.21	NaN	7.98	0.64	1.60	0.65	0.02	NaN	0.05
2013.140868	CARIBIC-FFM-BAN-20130221-13	235.20	521.22	222.64	3.23	NaN	7.90	0.64	1.60	0.65	0.02	NaN	0.05
2013.140868	CARIBIC-FFM-BAN-20130221-14	234.52	518.90	221.96	3.22	NaN	7.84	0.64	1.59	0.65	0.02	NaN	0.05
2013.140868	CARIBIC-FFM-BAN-20130221-14	NaN	NaN	NaN	NaN	3.93	NaN	NaN	NaN	NaN	NaN	0.00	NaN
2013.140868	CARIBIC-FFM-BAN-20130221-12	NaN	NaN	NaN	NaN	3.94	NaN	NaN	NaN	NaN	NaN	0.00	NaN
2013.140868	CARIBIC-FFM-BAN-20130221-10	NaN	NaN	NaN	NaN	3.94	NaN	NaN	NaN	NaN	NaN	0.00	NaN
2013.140868	CARIBIC-FFM-BAN-20130221-8	NaN	NaN	NaN	NaN	3.94	NaN	NaN	NaN	NaN	NaN	0.00	NaN
2013.140868	CARIBIC-FFM-BAN-20130221-5	NaN	NaN	NaN	NaN	3.91	NaN	NaN	NaN	NaN	NaN	0.00	NaN
2013.140868	CARIBIC-FFM-BAN-20130221-3	NaN	NaN	NaN	NaN	3.88	NaN	NaN	NaN	NaN	NaN	0.00	NaN
2013.140868	CARIBIC-FFM-BAN-20130221-1	NaN	NaN	NaN	NaN	3.82	NaN	NaN	NaN	NaN	NaN	0.00	NaN
2013.224201	FFM-BAN-20130321-01	234.36	519.93	226.58	3.25	NaN	7.94	0.65	3.85	0.31	0.01	NaN	0.06
2013.224201	FFM-BAN-20130321-3	227.31	511.45	216.92	3.15	NaN	7.76	0.63	3.79	0.29	0.01	NaN	0.06
2013.224201	FFM-BAN-20130321-5	233.60	515.20	217.54	3.18	NaN	7.76	0.65	3.82	0.30	0.01	NaN	0.06
2013.224201	FFM-BAN-20130321-7	233.67	515.38	219.02	3.21	NaN	7.80	0.65	3.82	0.30	0.01	NaN	0.06
2013.224201	FFM-BAN-20130321-9	233.22	519.06	220.29	3.21	NaN	7.78	0.65	3.85	0.30	0.01	NaN	0.06
2013.224201	FFM-BAN-20130321-11	234.32	522.17	219.93	3.24	NaN	7.82	0.65	3.87	0.30	0.01	NaN	0.06
2013.224201	FFM-BAN-20130321-14	235.01	523.93	221.26	3.24	NaN	7.88	0.66	3.88	0.30	0.01	NaN	0.06
2013.224201	FFM-BAN-20130321-01	NaN	NaN	NaN	NaN	3.93	NaN	NaN	NaN	NaN	NaN	0.09	NaN
2013.224201	FFM-BAN-20130321-3	NaN	NaN	NaN	NaN	3.71	NaN	NaN	NaN	NaN	NaN	0.08	NaN
2013.224201	FFM-BAN-20130321-5	NaN	NaN	NaN	NaN	3.80	NaN	NaN	NaN	NaN	NaN	0.09	NaN
2013.224201	FFM-BAN-20130321-7	NaN	NaN	NaN	NaN	3.83	NaN	NaN	NaN	NaN	NaN	0.09	NaN
2013.224201	FFM-BAN-20130321-9	NaN	NaN	NaN	NaN	3.85	NaN	NaN	NaN	NaN	NaN	0.09	NaN
2013.224201	FFM-BAN-20130321-11	NaN	NaN	NaN	NaN	3.86	NaN	NaN	NaN	NaN	NaN	0.09	NaN
2013.224201	FFM-BAN-20130321-13	NaN	NaN	NaN	NaN	3.93	NaN	NaN	NaN	NaN	NaN	0.09	NaN
2013.857991	CARIBIC-FFM-BKK-T3-1	233.24	524.89	231.38	3.25	NaN	8.10	0.38	0.75	0.41	0.02	NaN	0.01
2013.857991	CARIBIC-FFM-BKK-T3-2	232.46	519.40	228.86	3.22	NaN	8.13	0.38	0.74	0.41	0.02	NaN	0.01
2013.857991	CARIBIC-FFM-BKK-T3-3	232.41	520.93	228.24	3.26	NaN	8.10	0.38	0.74	0.41	0.02	NaN	0.01
2013.857991	CARIBIC-FFM-BKK-T3-4	233.10	519.01	229.11	3.26	NaN	7.99	0.38	0.74	0.41	0.02	NaN	0.01
2013.857991	CARIBIC-FFM-BKK-T3-5	232.85	515.99	226.65	3.26	NaN	8.08	0.48	2.71	1.16	0.02	NaN	0.02
2013.857991	CARIBIC-FFM-BKK-T3-6	233.58	521.75	228.35	3.27	NaN	8.07	0.48	2.74	1.17	0.02	NaN	0.02
2013.857991	CARIBIC-FFM-BKK-T3-7	234.23	525.57	228.37	3.28	NaN	8.11	0.48	2.76	1.17	0.02	NaN	0.02
2013.857991	CARIBIC-FFM-BKK-T3-8	233.05	522.54	226.90	3.27	NaN	8.13	0.48	2.75	1.16	0.02	NaN	0.02
2013.857991	CARIBIC-FFM-BKK-T3-9	236.98	525.44	226.92	3.30	NaN	8.09	0.48	2.76	1.16	0.02	NaN	0.02
2013.857991	CARIBIC-FFM-BKK-T3-10	236.97	524.78	235.06	3.28	NaN	8.18	0.48	2.76	1.20	0.02	NaN	0.02
2013.857991	CARIBIC-FFM-BKK-T3-11	235.40	522.31	238.28	3.28	NaN	8.28	0.48	2.75	1.22	0.02	NaN	0.02
2013.857991	CARIBIC-FFM-BKK-T3-12	235.78	521.10	239.38	3.28	NaN	8.45	0.48	2.74	1.23	0.02	NaN	0.02
2013.857991	CARIBIC-FFM-BKK-T3-13	235.57	518.88	240.34	3.29	NaN	8.41	0.48	2.73	1.23	0.02	NaN	0.02
2013.857991	CARIBIC-FFM-BKK-T3-14	234.22	516.22	240.17	3.25	NaN	8.45	0.48	2.72	1.23	0.02	NaN	0.02
2013.857991	CARIBIC-FFM-BKK-T3-14	NaN	NaN	NaN	NaN	3.91	8.35	NaN	NaN	NaN	NaN	0.01	0.03
2013.857991	CARIBIC-FFM-BKK-T3-13	NaN	NaN	NaN	NaN	3.95	8.40	NaN	NaN	NaN	NaN	0.01	0.03
2013.857991	CARIBIC-FFM-BKK-T3-12	NaN	NaN	NaN	NaN	3.95	8.40	NaN	NaN	NaN	NaN	0.01	0.03
2013.857991	CARIBIC-FFM-BKK-T3-11	NaN	NaN	NaN	NaN	3.89	8.31	NaN	NaN	NaN	NaN	0.01	0.03
2013.857991	CARIBIC-FFM-BKK-T3-9	NaN	NaN	NaN	NaN	3.86	8.09	NaN	NaN	NaN	NaN	0.01	0.03
2013.857991	CARIBIC-FFM-BKK-T3-8	NaN	NaN	NaN	NaN	3.84	8.10	NaN	NaN	NaN	NaN	0.01	0.03
2013.857991	CARIBIC-FFM-BKK-T3-7	NaN	NaN	NaN	NaN	3.84	8.07	NaN	NaN	NaN	NaN	0.01	0.03
2013.857991	CARIBIC-FFM-BKK-T3-6	NaN	NaN	NaN	NaN	3.83	8.11	NaN	NaN	NaN	NaN	0.01	0.03
2013.857991	CARIBIC-FFM-BKK-T3-3	NaN	NaN	NaN	NaN	3.85	8.12	NaN	NaN	NaN	NaN	0.01	0.03
2013.857991	CARIBIC-FFM-BKK-T3-1	NaN	NaN	NaN	NaN	3.82	8.04	NaN	NaN	NaN	NaN	0.01	0.03
2013.930365	CARIBIC-FFM-BKK-T5-01	235.86	520.26	232.94	3.29	NaN	8.19	0.78	1.21	1.53	0.02	NaN	0.06
2013.930365	CARIBIC-FFM-BKK-T5-2	233.99	519.43	228.81	3.28	NaN	8.11	0.78	1.21	1.51	0.02	NaN	0.06
2013.930365	CARIBIC-FFM-BKK-T5-3	233.28	521.90	229.87	3.30	NaN	8.09	0.77	1.22	1.51	0.02	NaN	0.06
2013.930365	CARIBIC-FFM-BKK-T5-4	234.23	521.09	232.64	3.28	NaN	8.13	0.78	1.21	1.53	0.02	NaN	0.06
2013.930365	CARIBIC-FFM-BKK-T5-5	231.84	517.67	230.59	3.22	NaN	8.13	0.77	1.21	1.52	0.02	NaN	0.06
2013.930365	CARIBIC-FFM-BKK-T5-6	234.18	523.21	230.86	3.28	NaN	8.13	0.78	1.22	1.52	0.02	NaN	0.06
2013.930365	CARIBIC-FFM-BKK-T5-7	233.11	526.88	227.94	3.29	NaN	8.04	0.77	1.23	1.50	0.02	NaN	0.06
2013.930365	CARIBIC-FFM-BKK-T5-8	234.31	523.02	230.85	3.29	NaN	8.17	0.78	1.22	1.52	0.02	NaN	0.06
2013.930365	CARIBIC-FFM-BKK-T5-9	234.97	524.77	230.86	3.31	NaN	8.22	0.78	1.22	1.52	0.02	NaN	0.06
2013.930365	CARIBIC-FFM-BKK-T5-10	235.05	521.44	239.08	3.31	NaN	8.42	0.38	3.10	0.61	0.01	NaN	0.05
2013.930365	CARIBIC-FFM-BKK-T5-11	235.40	519.81	237.49	3.27	NaN	8.42	0.38	3.09	0.61	0.01	NaN	0.05
2013.930365	CARIBIC-FFM-BKK-T5-12	234.27	522.00	236.32	3.27	NaN	8.38	0.38	3.10	0.60	0.01	NaN	0.05
2013.930365	CARIBIC-FFM-BKK-T5-13	235.29	524.68	243.92	3.34	NaN	8.48	0.38	3.12	0.62	0.01	NaN	0.05
2013.930365	CARIBIC-FFM-BKK-T5-14	235.14	523.54	240.58	3.30	NaN	8.45	0.38	3.11	0.61	0.01	NaN	0.05
2013.930365	CARIBIC-FFM-BKK-T5-02	NaN	NaN	NaN	NaN	3.89	8.13	NaN	NaN	NaN	NaN	0.03	0.01
2013.930365	CARIBIC-FFM-BKK-T5-4	NaN	NaN	NaN	NaN	3.90	8.21	NaN	NaN	NaN	NaN	0.03	0.01
2013.930365	CARIBIC-FFM-BKK-T5-6	NaN	NaN	NaN	NaN	3.86	8.09	NaN	NaN	NaN	NaN	0.03	0.01
2013.930365	CARIBIC-FFM-BKK-T5-8	NaN	NaN	NaN	NaN	3.87	8.16	NaN	NaN	NaN	NaN	0.03	0.01
2013.930365	CARIBIC-FFM-BKK-T5-10	NaN	NaN	NaN	NaN	3.93	8.46	NaN	NaN	NaN	NaN	0.03	0.01
2013.930365	CARIBIC-FFM-BKK-T5-12	NaN	NaN	NaN	NaN	3.89	8.31	NaN	NaN	NaN	NaN	0.03	0.01
2013.930365	CARIBIC-FFM-BKK-T5-14	NaN	NaN	NaN	NaN	3.92	8.38	NaN	NaN	NaN	NaN	0.03	0.01
2015.1121	CARIBIC-SA-2015-T6-14	230.96	NaN	229.07	NaN	NaN	8.46	5.20	NaN	5.87	NaN	NaN	0.08
2015.1121	CARIBIC-SA-2015-T6-13	244.08	NaN	235.52	NaN	NaN	8.39	5.50	NaN	6.04	NaN	NaN	0.08
2015.1121	CARIBIC-SA-2015-T6-12	231.29	NaN	227.60	NaN	NaN	8.52	5.21	NaN	5.84	NaN	NaN	0.08
2015.1121	CARIBIC-SA-2015-T6-11	231.44	NaN	231.40	NaN	NaN	8.48	5.21	NaN	5.93	NaN	NaN	0.08
2015.1121	CARIBIC-SA-2015-T6-10	228.05	NaN	231.07	NaN	NaN	8.48	5.14	NaN	5.92	NaN	NaN	0.08
2015.1121	CARIBIC-SA-2015-T6-09	226.07	NaN	227.95	NaN	NaN	8.50	5.09	NaN	5.84	NaN	NaN	0.08
2015.1121	CARIBIC-SA-2015-T6-08	222.09	NaN	227.56	NaN	NaN	8.50	5.00	NaN	5.83	NaN	NaN	0.08
2015.1121	CARIBIC-SA-2015-T6-07	224.91	NaN	226.36	NaN	NaN	8.38	5.07	NaN	5.80	NaN	NaN	0.08
2015.1121	CARIBIC-SA-2015-T6-06	227.86	NaN	225.70	NaN	NaN	8.37	5.13	NaN	5.79	NaN	NaN	0.08
2015.1121	CARIBIC-SA-2015-T6-05	235.45	NaN	228.11	NaN	NaN	8.35	5.31	NaN	5.85	NaN	NaN	0.08
2015.1121	CARIBIC-SA-2015-T6-01	NaN	NaN	231.87	NaN	NaN	8.68	0.00	NaN	1.37	NaN	NaN	0.06
2015.1121	CARIBIC-SA-2015-T6-02	NaN	NaN	226.90	NaN	NaN	8.52	0.00	NaN	1.34	NaN	NaN	0.05
2015.1121	CARIBIC-SA-2015-T6-03	NaN	NaN	232.80	NaN	NaN	8.58	0.00	NaN	1.37	NaN	NaN	0.05
2015.1121	CARIBIC-SA-2015-T6-04	NaN	NaN	225.51	NaN	NaN	8.48	0.00	NaN	1.33	NaN	NaN	0.05
2015.1121	CARIBIC-SA-2015-T5-14	NaN	NaN	227.83	NaN	NaN	8.41	0.00	NaN	1.34	NaN	NaN	0.05
2015.1121	CARIBIC-SA-2015-T5-13	NaN	NaN	231.77	NaN	NaN	8.41	0.00	NaN	1.37	NaN	NaN	0.05
2015.1121	CARIBIC-SA-2015-T5-12	NaN	NaN	231.31	NaN	NaN	8.38	0.00	NaN	1.36	NaN	NaN	0.05
2015.1121	CARIBIC-SA-2015-T5-11	NaN	NaN	233.31	NaN	NaN	8.51	0.00	NaN	1.37	NaN	NaN	0.05
2015.1121	CARIBIC-SA-2015-T5-10	NaN	NaN	229.81	NaN	NaN	8.47	0.00	NaN	1.35	NaN	NaN	0.05
2015.1121	CARIBIC-SA-2015-T5-09	NaN	NaN	232.27	NaN	NaN	8.39	0.00	NaN	1.37	NaN	NaN	0.05
2015.1121	CARIBIC-SA-2015-T5-01	232.84	NaN	238.11	NaN	NaN	8.65	2.65	NaN	2.55	NaN	NaN	0.03
2015.1121	CARIBIC-SA-2015-T5-02	231.56	NaN	235.58	NaN	NaN	8.60	2.63	NaN	2.52	NaN	NaN	0.03
2015.1121	CARIBIC-SA-2015-T5-03	229.09	NaN	234.38	NaN	NaN	8.63	2.60	NaN	2.51	NaN	NaN	0.03
2015.1121	CARIBIC-SA-2015-T5-04	234.45	NaN	239.15	NaN	NaN	8.60	2.66	NaN	2.56	NaN	NaN	0.03
2015.1121	CARIBIC-SA-2015-T5-05	235.75	NaN	238.62	NaN	NaN	8.66	2.68	NaN	2.55	NaN	NaN	0.03
2015.1121	CARIBIC-SA-2015-T5-06	235.45	NaN	239.02	NaN	NaN	8.66	2.68	NaN	2.56	NaN	NaN	0.03
2015.1121	CARIBIC-SA-2015-T5-07	229.65	NaN	233.83	NaN	NaN	8.65	2.61	NaN	2.50	NaN	NaN	0.03
2015.1121	CARIBIC-SA-2015-T5-08	231.48	NaN	232.40	NaN	NaN	8.52	2.63	NaN	2.49	NaN	NaN	0.03
2015.1121	CARIBIC-SA-2015-T5-01	231.69	518.36	NaN	3.29	3.74	8.61	2.28	4.03	NaN	0.03	0.04	0.09
2015.1121	CARIBIC-SA-2015-T5-02	231.50	509.94	NaN	3.26	3.71	8.63	2.28	3.97	NaN	0.03	0.04	0.09
2015.1121	CARIBIC-SA-2015-T5-04	232.26	515.38	NaN	3.30	3.72	8.63	2.29	4.01	NaN	0.03	0.04	0.09
2015.1121	CARIBIC-SA-2015-T5-06	230.66	515.14	NaN	3.22	3.76	8.55	2.27	4.01	NaN	0.03	0.04	0.09
2015.1121	CARIBIC-SA-2015-T5-08	230.60	516.22	NaN	3.22	3.69	8.55	2.27	4.01	NaN	0.03	0.04	0.09
2015.1121	CARIBIC-SA-2015-T5-10	230.22	513.50	NaN	3.25	3.67	8.45	2.27	3.99	NaN	0.03	0.04	0.09
2015.1121	CARIBIC-SA-2015-T5-12	231.45	521.27	NaN	3.28	3.69	8.52	2.28	4.05	NaN	0.03	0.04	0.09
2015.1121	CARIBIC-SA-2015-T5-14	231.39	519.37	NaN	3.29	3.76	8.48	2.28	4.04	NaN	0.03	0.04	0.09
2015.1121	CARIBIC-SA-2015-T6-02	232.20	521.96	NaN	3.25	3.69	8.50	2.29	4.06	NaN	0.03	0.04	0.09
2015.1121	CARIBIC-SA-2015-T6-04	230.06	517.68	NaN	3.22	3.68	8.39	2.27	4.03	NaN	0.03	0.04	0.08
2015.1121	CARIBIC-SA-2015-T6-06	230.51	513.83	NaN	3.23	3.73	8.40	2.03	2.50	NaN	0.05	0.02	0.05
2015.1121	CARIBIC-SA-2015-T6-08	229.73	510.82	NaN	3.17	3.72	8.43	2.02	2.48	NaN	0.05	0.02	0.05
2015.1121	CARIBIC-SA-2015-T6-10	230.68	517.44	NaN	3.24	3.73	8.37	2.03	2.52	NaN	0.05	0.02	0.05
2015.1121	CARIBIC-SA-2015-T6-12	231.51	517.02	NaN	3.26	3.76	8.47	2.04	2.51	NaN	0.05	0.02	0.05
2015.1121	CARIBIC-SA-2015-T6-14	230.35	516.78	NaN	3.26	3.69	8.41	2.03	2.51	NaN	0.05	0.02	0.05
2016.035616	CARIBIC-SA-T3-01	225.40	NaN	228.31	NaN	NaN	8.58	1.27	NaN	2.45	NaN	NaN	0.03
2016.035616	CARIBIC-SA-T3-02	229.26	NaN	231.38	NaN	NaN	8.71	1.29	NaN	2.48	NaN	NaN	0.03
2016.035616	CARIBIC-SA-T3-03	225.13	NaN	229.32	NaN	NaN	8.73	1.27	NaN	2.46	NaN	NaN	0.03
2016.035616	CARIBIC-SA-T3-04	231.03	NaN	232.27	NaN	NaN	8.75	1.30	NaN	2.49	NaN	NaN	0.03
2016.035616	CARIBIC-SA-T3-05	228.05	NaN	231.05	NaN	NaN	8.76	1.28	NaN	2.48	NaN	NaN	0.03
2016.035616	CARIBIC-SA-T3-06	229.92	NaN	235.08	NaN	NaN	8.79	1.29	NaN	2.52	NaN	NaN	0.03
2016.035616	CARIBIC-SA-T3-07	229.85	NaN	232.30	NaN	NaN	8.84	1.29	NaN	2.49	NaN	NaN	0.03
2016.035616	CARIBIC-SA-T3-14	232.77	NaN	241.03	NaN	NaN	8.90	0.78	NaN	1.21	NaN	NaN	0.02
2016.035616	CARIBIC-SA-T3-13	235.07	NaN	237.70	NaN	NaN	8.85	0.79	NaN	1.20	NaN	NaN	0.02
2016.035616	CARIBIC-SA-T3-12	227.88	NaN	235.22	NaN	NaN	8.71	0.77	NaN	1.18	NaN	NaN	0.02
2016.035616	CARIBIC-SA-T3-11	235.86	NaN	235.03	NaN	NaN	8.76	0.79	NaN	1.18	NaN	NaN	0.02
2016.035616	CARIBIC-SA-T3-10	229.65	NaN	235.44	NaN	NaN	8.76	0.77	NaN	1.18	NaN	NaN	0.02
2016.035616	CARIBIC-SA-T3-09	232.96	NaN	233.87	NaN	NaN	8.81	0.78	NaN	1.18	NaN	NaN	0.02
2016.035616	CARIBIC-SA-T3-08	231.54	NaN	234.78	NaN	NaN	8.74	0.78	NaN	1.18	NaN	NaN	0.02
2016.035616	CARIBIC-SA-T3-14	232.66	517.93	NaN	NaN	NaN	8.85	2.12	2.63	NaN	NaN	NaN	0.05
2016.035616	CARIBIC-SA-T3-12	232.04	515.80	NaN	NaN	NaN	8.73	2.11	2.62	NaN	NaN	NaN	0.05
2016.035616	CARIBIC-SA-T3-09	232.21	515.84	NaN	NaN	NaN	8.76	2.12	2.62	NaN	NaN	NaN	0.05
2016.035616	CARIBIC-SA-T3-07	230.18	511.60	NaN	NaN	NaN	8.69	2.10	2.60	NaN	NaN	NaN	0.05
2016.035616	CARIBIC-SA-T3-05	230.16	515.79	NaN	NaN	NaN	8.74	2.10	2.62	NaN	NaN	NaN	0.05
2016.035616	CARIBIC-SA-T3-03	232.36	517.26	NaN	NaN	NaN	8.68	2.12	2.63	NaN	NaN	NaN	0.05
2016.035616	CARIBIC-SA-T3-01	224.67	506.89	NaN	NaN	NaN	8.55	2.05	2.58	NaN	NaN	NaN	0.04
2016.124429	CARIBIC-SA-T5-14	232.17	513.59	243.24	3.33	3.64	9.11	7.56	1.90	1.65	0.03	0.03	0.11
2016.124429	CARIBIC-SA-T5-13	210.92	479.92	224.10	3.00	3.14	8.85	6.87	1.78	1.52	0.03	0.03	0.11
2016.124429	CARIBIC-SA-T5-12	228.59	504.74	232.27	3.18	3.42	8.64	7.45	1.87	1.58	0.03	0.03	0.11
2016.124429	CARIBIC-SA-T5-11	231.65	513.25	235.71	3.26	3.60	8.84	7.55	1.90	1.60	0.03	0.03	0.11
2016.124429	CARIBIC-SA-T5-10	232.06	511.70	235.79	3.25	3.61	8.88	7.56	1.90	1.60	0.03	0.03	0.11
2016.124429	CARIBIC-SA-T5-09	232.61	516.44	234.95	3.28	3.59	8.88	7.58	1.91	1.59	0.03	0.03	0.11
2016.124429	CARIBIC-SA-T5-08	232.63	518.80	236.69	3.29	3.60	8.90	0.55	3.76	0.77	0.05	0.04	0.02
2016.124429	CARIBIC-SA-T5-07	230.26	515.88	237.88	3.26	3.60	8.93	0.54	3.73	0.78	0.05	0.04	0.02
2016.124429	CARIBIC-SA-T5-06	230.00	511.25	235.10	3.25	3.60	8.92	0.54	3.70	0.77	0.05	0.04	0.02
2016.124429	CARIBIC-SA-T5-05	230.66	509.98	233.21	3.27	3.63	8.80	0.54	3.69	0.76	0.05	0.04	0.02
2016.124429	CARIBIC-SA-T5-04	230.29	511.53	232.29	3.25	3.61	8.78	0.54	3.70	0.76	0.05	0.04	0.02
2016.124429	CARIBIC-SA-T5-03	230.76	512.99	231.28	3.30	3.60	9.07	0.54	3.71	0.76	0.05	0.04	0.02
2016.124429	CARIBIC-SA-T5-02	231.49	519.46	235.69	3.28	3.66	8.91	0.54	3.76	0.77	0.05	0.04	0.02
2016.124429	CARIBIC-SA-T5-01	226.95	511.29	226.61	3.22	3.57	8.75	0.53	3.70	0.74	0.05	0.04	0.02
