# Supplementary material for: Investigating stratospheric changes between 2009 and 2018 with aircraft, AirCores, and a global model focusing on CFC-11
Source: Copernicus journal article supplement (doi:10.5194/acp-2020-62), 2020-02-14
Supplement: Supplementary file 1 [file acp-2020-62-supplement.zip › Supplement-Laube et al-Geophysika-data.csv]

sample_id	flight_date	mean_age	age_error	CFC-11	CFC-12	HCFC-22	H-1301	H-1211	CFC-11_error	CFC-12_error	HCFC-22_error	H-1301_error	H-1211_error
	dd/mm/yyyy	years	years	ppt	ppt	ppt	ppt	ppt	ppt	ppt	ppt	ppt	ppt
F1-01(B1/3)	01.11.2009	1.69	0.17	192.47	474.50	174.26	2.45	2.81	1.80	5.96	1.37	0.01	0.02
F1-02(B1/17)	01.11.2009	1.76	0.14	183.24	464.80	171.58	2.37	2.50	0.37	5.31	0.78	0.02	0.01
F1-03(S3/18)	01.11.2009	1.75	0.51	166.15	443.00	166.51	2.21	2.18	1.55	3.15	1.50	0.01	0.01
F1-04(T3/15)	01.11.2009	1.68	0.18	164.56	445.70	166.32	2.17	2.12	1.54	5.60	1.31	0.01	0.01
F1-05(S1/14)	01.11.2009	1.38	0.56	177.08	461.40	170.18	2.34	2.41	1.65	3.28	1.53	0.01	0.01
F1-06(R2/19)	01.11.2009	2.32	0.04	143.31	420.70	159.87	1.97	1.70	1.34	2.99	1.44	0.01	0.01
F1-07(B1/2)	01.11.2009	2.73	0.12	134.37	406.80	156.66	1.86	1.52	0.27	4.65	0.71	0.01	0.00
F1-08(R1/2)	01.11.2009	2.43	0.46	151.65	427.50	162.53	2.06	1.82	1.42	3.04	1.46	0.01	0.01
F1-09(S2/5)	01.11.2009	2.19	0.17	134.87	404.40	155.81	1.86	1.53	1.26	5.08	1.23	0.01	0.01
F1-10(R2/13)	01.11.2009	2.12	0.49	162.38	441.40	166.49	2.15	2.05	1.52	3.14	1.50	0.01	0.01
F1-11(B1/13)	01.11.2009	2.96	0.02	125.43	392.80	153.05	1.77	1.37	0.76	7.65	2.59	0.01	0.03
F1-12(N1)	01.11.2009	2.40	0.48	150.96	428.30	162.72	2.05	1.78	1.41	3.05	1.47	0.01	0.01
F1-13(R2/4)	01.11.2009	3.27	0.12	113.52	378.20	150.50	1.62	1.08	0.23	4.32	0.69	0.01	0.00
F1-14(N2)	01.11.2009	3.30	0.15	100.90	361.40	146.21	1.46	0.88	0.94	4.54	1.15	0.01	0.01
F1-15(102)	01.11.2009	1.68	0.51	181.45	464.90	172.51	2.37	2.55	1.69	3.31	1.55	0.01	0.01
F1-16(R2/3)	01.11.2009	0.53	0.21	225.64	522.60	192.29	2.83	3.68	2.11	6.56	1.51	0.02	0.02
F2-01(R3/19)	01.11.2009	1.59	0.33	182.54	463.30	173.41	2.38	2.59	1.11	9.03	2.94	0.01	0.05
F2-02(R3/15)	01.11.2009	3.08	0.27	106.86	368.90	149.41	1.56	1.05	0.65	7.19	2.53	0.01	0.02
F2-03(R3/9)	01.11.2009	3.15	0.27	110.14	371.90	149.84	1.58	1.11	0.67	7.25	2.54	0.01	0.02
F2-04(R3/7)	01.11.2009	4.05	0.24	67.24	305.60	135.20	1.11	0.47	0.41	5.95	2.29	0.00	0.01
F2-05(B1/18)	01.11.2009	2.84	0.28	98.62	353.70	145.38	1.45	0.91	0.39	2.98	1.21	0.01	0.01
F2-06 (N3)	01.11.2009	2.93	0.28	120.27	386.40	153.28	1.71	1.23	0.73	7.53	2.60	0.01	0.02
F2-07 (N4)	01.11.2009	1.12	0.33	190.78	474.00	177.16	2.48	2.81	0.75	3.99	1.48	0.02	0.02
F2-09(R3/5)	01.11.2009	1.80	0.30	182.04	466.10	173.10	2.39	2.59	0.72	3.92	1.44	0.02	0.01
F2-10(R3/4)	01.11.2009	3.17	0.26	97.23	350.40	145.88	1.46	0.89	0.38	2.95	1.22	0.01	0.01
F2-11(B1/7)	01.11.2009	3.43	0.25	81.34	330.70	140.45	1.27	0.66	0.32	2.78	1.17	0.01	0.00
F2-13(R3/18)	01.11.2009	3.95	0.24	63.66	302.50	135.64	1.07	0.42	0.25	2.55	1.13	0.01	0.00
F2-14(R3/13)	01.11.2009	3.92	0.24	58.20	295.20	133.29	1.00	0.35	0.23	2.48	1.11	0.01	0.00
F2-15(R3/17)	01.11.2009	2.74	0.29	72.60	316.00	137.75	1.20	0.56	0.29	2.66	1.15	0.01	0.00
F2-16(R3/3)	01.11.2009	3.02	0.27	104.48	361.60	146.13	1.54	1.03	0.41	3.04	1.22	0.01	0.01
F2-17(707)(R2/6)	01.11.2009	0.35	0.36	226.34	517.10	192.76	2.85	3.71	0.89	4.35	1.61	0.02	0.02
U101	20.01.2010	3.76	0.97	68.05	299.65	136.06	1.07	0.58	0.71	1.32	0.73	0.01	0.01
U102	20.01.2010	4.02	0.31	69.42	299.98	136.88	1.12	0.61	0.39	1.26	0.54	0.01	0.00
U103	20.01.2010	3.77	0.21	75.12	311.33	139.36	1.16	0.66	0.54	2.12	1.07	0.01	0.01
U104	20.01.2010	3.92	0.10	64.54	291.03	135.50	1.03	0.55	0.67	1.28	0.73	0.01	0.01
U105	20.01.2010	4.11	0.19	54.11	273.00	130.95	0.92	0.37	0.39	1.86	1.01	0.01	0.01
U106	20.01.2010	4.06	0.20	57.76	279.63	131.76	0.96	0.42	0.42	1.90	1.01	0.01	0.01
U107	20.01.2010	4.00	0.21	59.74	283.33	132.58	1.00	0.47	0.43	1.93	1.02	0.01	0.01
U108	20.01.2010	3.80	0.21	74.46	308.57	136.98	1.18	0.66	0.54	2.10	1.05	0.01	0.01
U109	20.01.2010	4.02	0.20	71.51	298.85	135.38	1.12	0.61	0.52	2.03	1.04	0.01	0.01
U110	20.01.2010	4.04	0.20	56.89	278.10	133.39	0.94	0.40	0.41	1.89	1.02	0.01	0.01
U111	20.01.2010	4.33	0.19	52.37	272.47	131.61	0.89	0.34	0.38	1.85	1.01	0.01	0.01
U112	20.01.2010	0.73	0.93	214.44	500.70	185.23	2.70	3.38	1.20	2.10	0.73	0.02	0.02
U113	20.01.2010	3.12	0.32	123.89	381.62	154.32	1.72	1.49	0.69	1.60	0.61	0.01	0.01
U114	20.01.2010	4.12	0.22	50.34	264.96	130.50	0.87	0.35	0.28	1.11	0.52	0.01	0.00
U236	20.01.2010	1.62	0.39	193.36	474.34	178.08	2.50	2.89	1.08	1.99	0.71	0.02	0.01
U237	20.01.2010	3.39	0.32	105.38	354.94	149.86	1.52	1.17	0.59	1.49	0.59	0.01	0.01
U238	20.01.2010	3.24	0.21	111.01	364.69	151.78	1.61	1.28	0.80	2.48	1.17	0.02	0.02
U239	20.01.2010	3.15	0.97	116.42	374.02	151.65	1.64	1.32	1.21	1.64	0.81	0.02	0.02
U240	20.01.2010	1.31	0.40	202.11	482.97	181.93	2.59	3.18	1.13	2.03	0.72	0.02	0.01
U241	20.01.2010	2.94	0.33	132.66	393.96	157.87	1.82	1.66	0.74	1.66	0.63	0.02	0.01
U129	22.01.2010	4.24	0.12	55.43	274.31	131.38	0.91	0.41	0.61	3.57	1.13	0.01	0.00
U130	22.01.2010	3.35	0.15	104.40	357.39	149.27	1.49	1.10	0.79	4.14	1.78	0.01	0.01
U131	22.01.2010	3.56	0.33	91.03	337.20	145.81	1.37	0.91	0.70	3.96	2.93	0.01	0.02
U132	22.01.2010	4.27	0.35	60.44	282.78	133.30	0.99	0.45	0.95	1.96	0.72	0.01	0.01
U133	22.01.2010	-0.09	0.21	239.59	524.15	204.57	2.98	4.06	1.81	6.07	2.44	0.01	0.04
U134	22.01.2010	2.59	0.19	145.33	421.02	163.72	1.97	1.89	1.73	3.63	1.30	0.01	0.01
U135	22.01.2010	4.29	0.16	45.95	261.69	131.73	0.78	0.28	0.35	3.03	1.57	0.00	0.00
U136	22.01.2010	4.43	0.11	42.84	246.95	126.06	0.77	0.27	0.47	3.21	1.09	0.01	0.00
U137	22.01.2010	2.69	0.68	141.91	407.72	160.45	1.92	1.83	1.69	3.52	1.28	0.01	0.01
U139	22.01.2010	4.26	0.11	53.00	269.35	130.08	0.88	0.36	0.59	3.50	1.12	0.01	0.00
U140	22.01.2010	1.84	0.57	177.86	456.33	172.73	2.32	2.52	1.34	5.28	2.06	0.01	0.02
U141	22.01.2010	4.32	0.37	56.95	276.83	131.62	0.96	0.42	0.44	3.25	2.65	0.00	0.01
U142	22.01.2010	4.58	0.23	39.41	237.98	124.70	0.72	0.23	0.37	2.59	1.44	0.00	0.00
U143	22.01.2010	4.40	0.37	52.37	265.35	130.14	0.90	0.39	0.40	3.11	2.62	0.00	0.01
U144	22.01.2010	4.28	0.83	51.82	268.64	129.95	0.88	0.36	0.40	3.15	2.61	0.00	0.01
U145	22.01.2010	4.42	0.34	49.21	263.88	130.41	0.82	0.32	0.77	1.83	0.70	0.01	0.00
U149	22.01.2010	3.93	0.11	75.31	310.33	139.82	1.18	0.69	0.83	4.04	1.20	0.01	0.00
U153	22.01.2010	4.31	0.39	52.32	271.39	130.92	0.90	0.36	0.40	3.19	2.63	0.00	0.01
U173	24.01.2010	3.89	0.69	79.43	320.89	139.95	1.26	0.66	0.61	3.77	2.81	0.01	0.01
U174	24.01.2010	0.44	0.24	223.70	519.17	195.08	2.86	3.78	2.66	4.48	1.55	0.02	0.02
U178	24.01.2010	3.99	0.40	74.39	308.59	137.24	1.18	0.58	0.57	3.62	2.76	0.01	0.01
U179	24.01.2010	3.86	0.24	71.00	303.78	138.60	1.12	0.55	0.67	3.31	1.60	0.01	0.01
U180	24.01.2010	2.23	0.27	166.52	438.13	166.47	2.21	2.32	1.57	4.78	1.93	0.01	0.03
U182	24.01.2010	3.48	0.60	100.31	348.82	147.48	1.47	1.01	0.76	4.04	1.76	0.01	0.01
U155	28.01.2010	3.82	0.22	67.88	307.59	139.60	1.09	0.48	0.91	2.25	0.61	0.01	0.01
U170	28.01.2010	4.24	0.32	49.26	269.33	130.98	0.87	0.26	0.66	1.97	0.57	0.01	0.00
U150	30.01.2010	4.22	0.36	53.31	277.79	132.77	0.91	0.34	0.83	1.93	0.72	0.01	0.00
U160	30.01.2010	2.05	0.44	178.54	457.86	173.06	2.32	2.55	2.79	3.18	0.93	0.02	0.03
U176	30.01.2010	4.15	0.32	52.65	267.00	130.92	0.87	0.36	0.71	1.95	0.57	0.01	0.01
U177	30.01.2010	4.11	0.23	49.71	268.54	131.56	0.88	0.32	0.47	2.93	1.52	0.00	0.00
U183	30.01.2010	2.71	0.26	139.41	399.90	157.38	1.92	1.76	1.32	4.36	1.82	0.01	0.02
U184	30.01.2010	4.48	0.23	40.78	243.46	127.76	0.76	0.23	0.39	2.65	1.48	0.00	0.00
U226	30.01.2010	4.55	0.23	38.45	235.74	123.86	0.71	0.24	0.36	2.57	1.43	0.00	0.00
U243	30.01.2010	4.15	0.23	54.75	271.85	131.09	0.94	0.36	0.52	2.96	1.52	0.00	0.00
U246	30.01.2010	4.48	0.35	35.99	236.67	126.77	0.68	0.22	0.34	2.58	1.47	0.00	0.00
U249	30.01.2010	4.35	0.36	45.61	258.33	129.18	0.79	0.27	0.71	1.79	0.70	0.01	0.00
U252	30.01.2010	4.40	0.23	37.20	236.35	125.94	0.69	0.23	0.35	2.58	1.46	0.00	0.00
U253	30.01.2010	4.02	0.33	52.22	271.46	131.27	0.87	0.32	0.70	1.99	0.57	0.01	0.01
U254	30.01.2010	4.09	0.36	53.61	278.47	133.25	0.91	0.33	0.84	1.93	0.72	0.01	0.00
U189	11.12.2011	2.95	0.62	132.51	385.32	168.27	1.92	1.54	1.06	3.76	2.21	0.06	0.03
U190	11.12.2011	4.68	0.14	63.88	271.34	140.39	1.06	0.56	0.84	3.25	1.21	0.04	0.01
U194	11.12.2011	3.79	0.27	113.75	362.60	162.45	1.68	1.23	1.50	4.34	1.40	0.06	0.01
U200	11.12.2011	4.27	0.33	67.13	284.64	145.60	1.13	0.54	0.54	2.78	1.91	0.03	0.01
U202	11.12.2011	2.04	0.83	164.22	435.87	181.24	2.25	2.23	2.16	5.22	1.56	0.08	0.02
U203	11.12.2011	3.36	0.40	116.00	364.82	162.66	1.70	1.27	1.31	3.67	3.24	0.05	0.04
U204	11.12.2011	2.84	0.94	124.85	381.10	165.10	1.82	1.44	1.64	4.56	1.42	0.06	0.01
U207	11.12.2011	3.10	0.74	111.68	359.92	161.15	1.71	1.22	1.47	4.31	1.39	0.06	0.01
U215	11.12.2011	3.74	0.89	95.48	327.99	154.68	1.41	0.88	0.83	3.49	1.29	0.05	0.01
U221	11.12.2011	4.96	0.35	19.41	170.38	122.37	0.43	0.08	0.26	2.04	1.05	0.02	0.00
U286	11.12.2011	4.22	0.79	56.20	249.21	137.86	0.94	0.45	0.70	12.38	4.12	0.04	0.02
U288	11.12.2011	3.07	0.53	54.81	258.94	139.39	0.94	0.40	0.68	12.86	4.16	0.04	0.02
U289	11.12.2011	3.25	0.27	138.55	396.83	170.41	1.87	1.67	1.82	4.75	1.47	0.07	0.02
U292	11.12.2011	4.90	0.81	13.59	152.21	119.19	0.34	0.04	0.17	7.56	3.56	0.02	0.00
U293	11.12.2011	4.05	0.85	46.70	234.90	136.69	0.81	0.36	0.58	11.67	4.08	0.04	0.02
U294	11.12.2011	3.54	0.79	91.75	326.48	153.34	1.36	0.87	0.80	3.48	1.28	0.04	0.01
U298	11.12.2011	4.67	0.51	16.27	163.60	120.44	0.41	0.05	0.20	8.13	3.60	0.02	0.00
U299	11.12.2011	3.03	0.53	113.48	361.94	163.76	1.64	1.26	1.41	17.98	4.89	0.08	0.06
U160	16.12.2011	4.31	0.79	21.24	171.92	122.06	0.46	0.10	0.15	3.22	2.02	0.01	0.00
U164	16.12.2011	5.41	0.18	17.48	162.31	120.50	0.42	0.06	0.12	3.04	1.99	0.01	0.00
U171	16.12.2011	4.17	0.48	18.47	167.26	120.10	0.40	0.09	0.13	3.13	1.98	0.01	0.00
U172	16.12.2011	3.20	0.85	113.01	359.07	160.19	1.67	1.18	0.93	3.04	1.38	0.05	0.01
U230	16.12.2011	4.30	0.79	69.75	288.61	145.63	1.08	0.61	0.57	2.44	1.25	0.03	0.00
U232	16.12.2011	4.45	0.18	72.62	290.09	146.25	1.15	0.68	0.50	5.43	2.41	0.04	0.01
U235	16.12.2011	3.06	0.87	86.32	317.67	150.95	1.34	0.80	0.71	2.69	1.30	0.04	0.01
U243	16.12.2011	1.07	0.83	189.02	466.71	188.33	2.46	2.67	1.31	8.73	3.11	0.08	0.04
U248	16.12.2011	3.55	0.64	103.41	343.11	152.11	1.54	1.09	0.72	6.42	2.51	0.05	0.02
U266	16.12.2011	5.21	0.46	18.85	165.28	122.68	0.40	0.09	0.13	3.09	2.03	0.01	0.00
FL2-05-U179	03.09.2016	1.16	0.27	194.29	471.58	221.57	2.74	2.67	0.96	1.97	1.82	0.02	0.02
FL2-06-U124	04.09.2016	2.14	0.24	160.64	425.50	207.09	2.31	1.96	0.79	1.78	1.70	0.02	0.01
FL2-07-U89	05.09.2016	1.94	0.26	163.86	425.55	204.42	2.40	2.05	0.51	8.86	3.05	0.02	0.02
FL2-08-U237	06.09.2016	2.32	0.17	152.97	414.10	202.98	2.20	1.83	0.69	0.61	1.61	0.01	0.00
FL2-09-U19	07.09.2016	2.11	0.24	153.89	412.83	200.57	2.26	1.82	0.48	8.63	2.99	0.01	0.02
FL2-10-U113	08.09.2016	2.58	0.16	138.14	396.19	198.73	2.07	1.53	0.69	1.66	1.63	0.01	0.01
FL2-11-U125	09.09.2016	1.96	0.16	163.72	429.87	207.27	2.36	2.05	0.36	2.37	2.02	0.02	0.01
FL2-12-U177	10.09.2016	0.12	0.18	223.18	506.76	238.89	3.03	3.40	1.10	2.13	1.96	0.02	0.02
FL2-13-U128	11.09.2016	-0.35	0.18	229.34	508.19	247.02	3.10	3.49	1.14	2.13	2.03	0.02	0.02
FL3-01-U200	12.09.2016	0.81	0.17	212.81	496.07	230.59	2.88	3.17	0.66	10.47	3.44	0.02	0.03
FL3-02-U133	13.09.2016	1.33	0.06	194.81	472.05	219.23	2.67	2.71	1.69	3.97	1.29	0.03	0.01
FL3-03-U285	14.09.2016	0.83	0.22	204.97	483.68	224.00	2.77	2.91	1.77	4.05	1.32	0.04	0.02
FL3-04-U137	15.09.2016	1.00	0.14	206.97	490.32	228.20	2.85	2.94	0.64	10.35	3.40	0.02	0.03
FL3-05-U251	16.09.2016	0.59	0.23	216.15	493.32	230.03	2.92	3.16	1.87	4.11	1.35	0.04	0.02
FL3-06-U207	17.09.2016	0.45	0.12	217.32	503.17	231.96	2.85	3.20	1.89	4.22	1.36	0.04	0.02
FL3-07-U192	18.09.2016	0.43	0.14	217.44	499.97	232.68	2.90	3.20	1.89	4.21	1.37	0.04	0.02
FL3-08-U167	19.09.2016	-0.59	0.14	231.77	510.57	252.60	3.12	3.53	0.72	10.72	3.77	0.02	0.03
FL3-09-U201	20.09.2016	0.68	0.37	200.87	478.83	222.09	2.70	2.79	1.74	4.04	1.31	0.03	0.01
FL3-10-U206	21.09.2016	2.05	0.25	166.28	430.05	206.83	2.37	2.06	1.44	3.57	1.22	0.03	0.01
FL3-11-U204	22.09.2016	2.59	0.28	139.24	401.02	199.15	2.08	1.53	0.43	8.42	2.97	0.01	0.01
FL3-12-U151	23.09.2016	2.77	0.25	131.53	388.97	193.84	2.01	1.38	0.40	1.21	0.38	0.01	0.00
FL3-13-U286	24.09.2016	2.79	0.17	127.36	384.01	194.00	1.96	1.30	0.40	8.10	2.89	0.01	0.01
FL3-14-U221	25.09.2016	3.02	0.15	120.35	376.80	191.61	1.84	1.17	1.05	3.19	1.13	0.02	0.01
FL3-16-U120	26.09.2016	-0.06	0.19	229.31	512.02	243.25	3.11	3.50	1.92	4.85	2.73	0.04	0.02
